# Supplementary material for: Evaluation of Anticorrosion Coatings for Offshore Wind Turbine Monopiles for an Optimized and Time-Efficient Coating Application
Source: MDPI journal article supplement (doi:10.3390/coatings12030384), 2022-03-14
Supplement: s1 [file s1]

Supplementary

# Evaluation of Anticorrosion Coatings for Offshore Wind Turbine Monopiles for an Optimized and Time-Efficient Coating Application

Nevena Marinova <sup>1,\*</sup>, Aiala Urbegain <sup>1</sup>, Pablo Benguria <sup>1</sup>, Andreu Travé <sup>2</sup> and Raúl Caracena <sup>1,\*</sup>

<sup>1</sup> Tecnalia, Basque Research and Technology Alliance (BRTA), Parque Tecnológico de San Sebastián Mikeletegi Pasealekua, 2, E-20009 Donostia-San Sebastián, Spain; aiala.urbegain@tecnalia.com (A.U.); pablo.benguria@tecnalia.com (P.B.)

<sup>2</sup> Travé Consulting, Avda Rius I Taulet 125 G 08173 Sant Cugat del Vallés, Spain; traveandreu@gmail.com

\* Correspondence: nevenamarinova@abv.bg (N.M.); raul.caracena@tecnalia.com (R.C.)

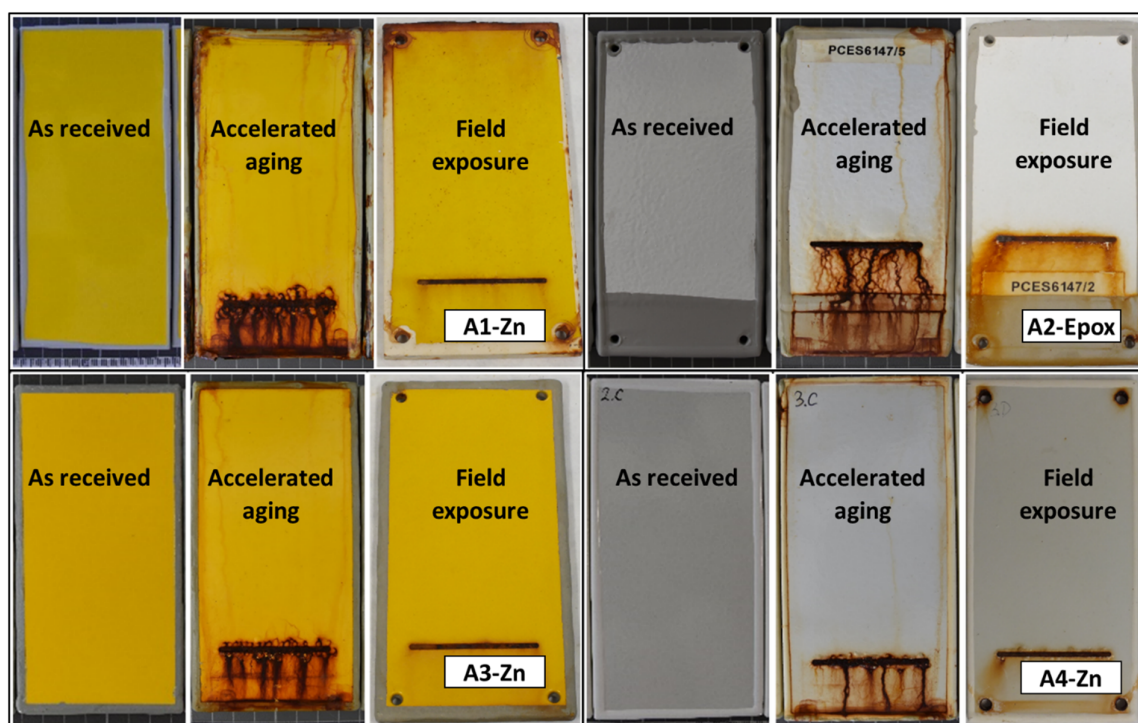

**Figure S1.** Visual appearance of the atmospheric zone test panels: as received, after accelerated laboratory aging and after field exposure.

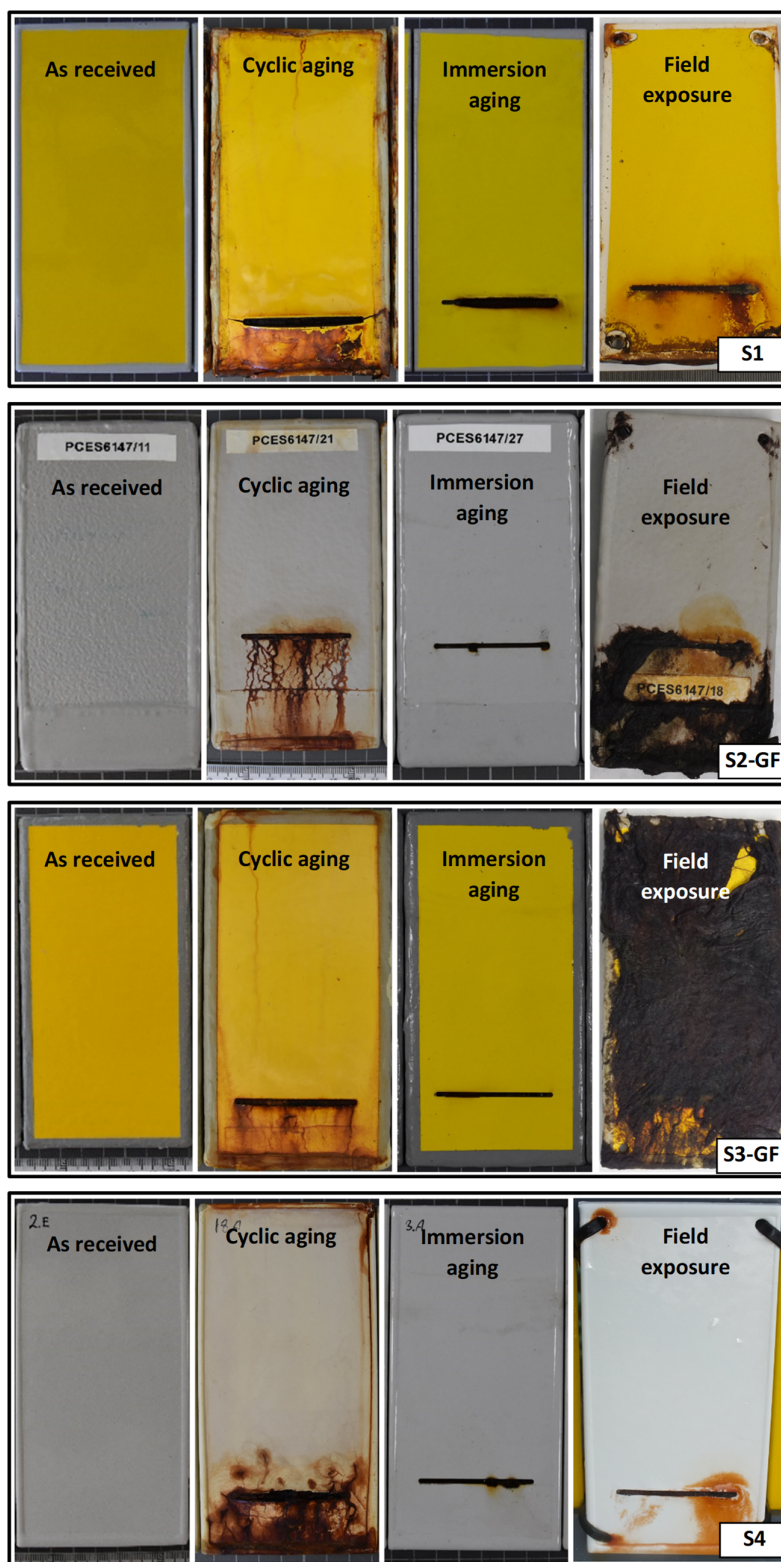

**Figure S2.** Visual appearance of the splash zone test panels: as received, after accelerated laboratory aging and after field exposure.

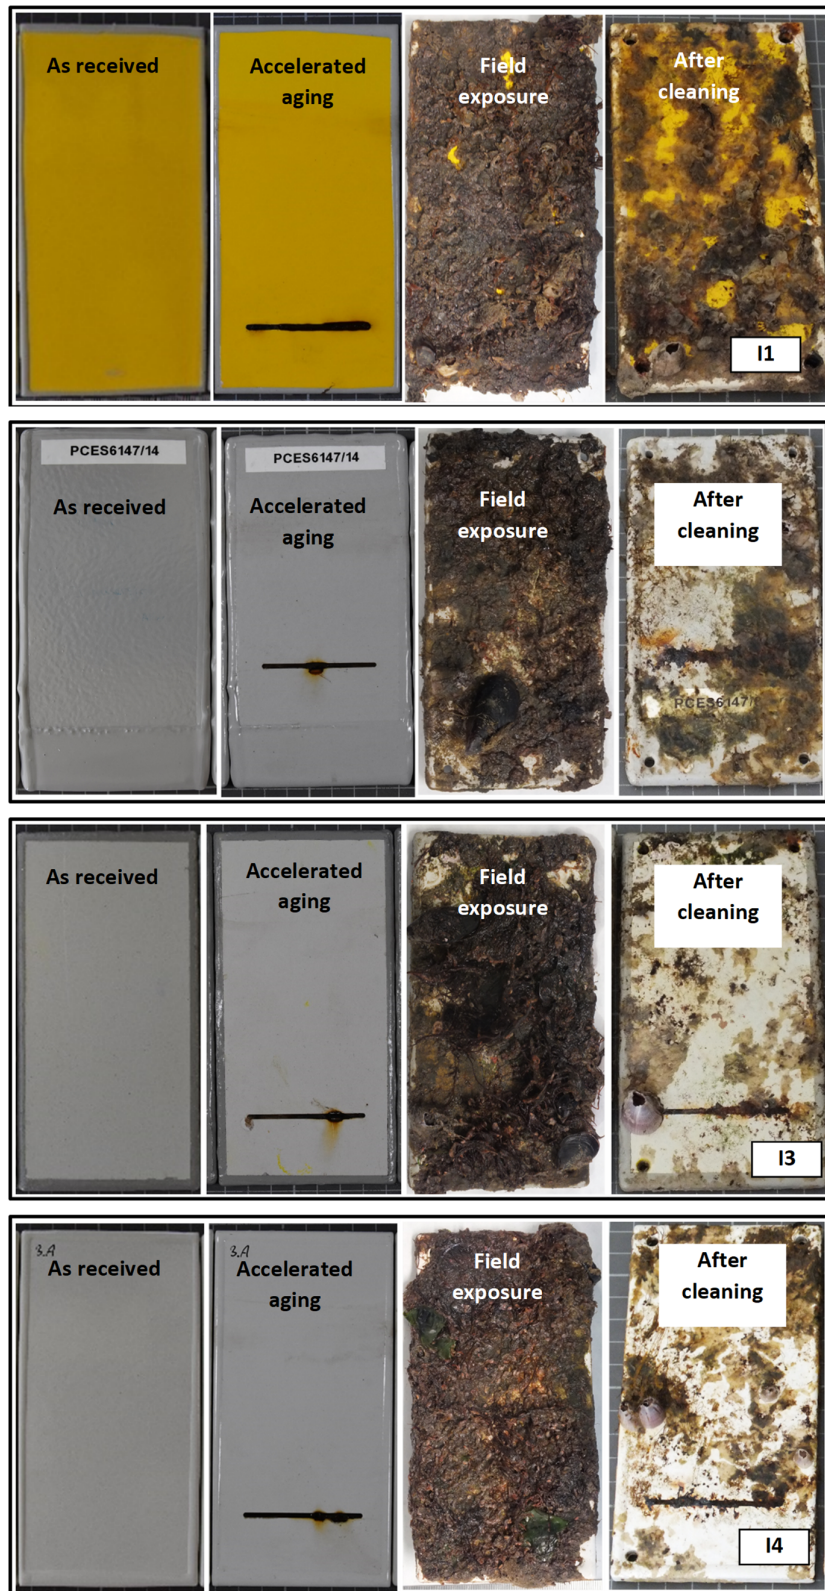

**Figure S3.** Visual appearance of the submerged zone test panels: as received, after accelerated laboratory aging, after field exposure and after cleaning employing high pressure water gun.



**Table S1.** Cathodic protection data for splash zone coatings.

| Reference |                 | Blistering<br>ISO 4628-2:2016 | Cathodic Disbond-<br>ing<br>(mm) |
|-----------|-----------------|-------------------------------|----------------------------------|
| System    | Panel N°        |                               |                                  |
| S1        | Reference panel | 0 (S0)                        | 11                               |
|           | 1               | 0 (S0)                        | 0                                |
|           | 2               | 0 (S0)                        | 0                                |
|           | 3               | 0 (S0)                        | 0                                |
| S2-GF     | Reference panel | 0 (S0)                        | 12                               |
|           | 1               | 0 (S0)                        | 0                                |
|           | 2               | 0 (S0)                        | 0                                |
|           | 3               | 0 (S0)                        | 0                                |
| S3-GF     | Reference panel | 0 (S0)                        | 22                               |
|           | 1               | 0 (S0)                        | 19                               |
|           | 2               | 0 (S0)                        | 18                               |
|           | 3               | 0 (S0)                        | 24                               |
| S4        | Reference panel | 0 (S0)                        | 0                                |
|           | 1               | 0 (S0)                        | 0                                |
|           | 2               | 0 (S0)                        | 0                                |
|           | 3               | 0 (S0)                        | 0                                |

**Table S2.** Cathodic protection data for submerged zone coatings.

| Reference |                 | Blistering<br>ISO 4628-2:2016 | Cathodic Disbond-<br>ing<br>(mm) |
|-----------|-----------------|-------------------------------|----------------------------------|
| System    | Panel N°        |                               |                                  |
| I1        | Reference panel | 3 (S4)                        | 0                                |
|           | 1               | 3 (S4)                        | 0                                |
|           | 2               | 3 (S4)                        | 0                                |
|           | 3               | 3 (S4)                        | 0                                |
| I2-GF     | Reference panel | 0 (S0)                        | 14                               |
|           | 1               | 0 (S0)                        | 20                               |
|           | 2               | 0 (S0)                        | 14                               |
|           | 3               | 0 (S0)                        | 23                               |
| I3        | Reference panel | 0 (S0)                        | 41                               |
|           | 1               | 1 (S4)                        | 38                               |
|           | 2               | 0 (S0)                        | 35                               |
|           | 3               | 0 (S0)                        | 23                               |
| I4        | Reference panel | 0 (S0)                        | 0                                |
|           | 1               | 0 (S0)                        | 0                                |
|           | 2               | 0 (S0)                        | 0                                |
|           | 3               | 0 (S0)                        | 0                                |
